# Supplementary material
Source: PubMed Central journal article supplement (PMC2962921)
Supplement: NIHMS127068-supplement-Supplemental_Information.pdf [file NIHMS127068-supplement-Supplemental_Information.pdf]

**CHEMBIOCHEM**

## Supporting Information

© Copyright Wiley-VCH Verlag GmbH & Co. KGaA, 69451 Weinheim, 2008

# CHEM**BIO**CHEM

## Supporting Information

for

### N-Methyl Scanning Mutagenesis Generates Protease-Resistant G Protein Ligands with Improved Affinity and Selectivity

Stephen V. Fiacco and Richard W. Roberts

Table of Contents:

Peptide Synthesis and Characterization

S2

N-Methyl Selectivity

S5

## Peptide Synthesis

### Analysis by MALDI-TOF MS:

Unmodified peptide Expected  $[M+H]^+ = 1871.0$ , obs.  $[M+H]^+ = 1870.4$  The expected mass of peptides with 1 *N*-methyl residue  $[M+H]^+ = 1885.4$ , N-Me-D obs.  $[M+H]^+ = 1885.3$  N-Me-K obs.  $[M+H]^+ = 1884.5$  N-Me-L obs.  $[M+H]^+ = 1884.7$  N-Me-Y obs.  $[M+H]^+ = 1885.9$  N-Me-W10 obs.  $[M+H]^+ = 1884.6$  N-Me-W11 obs.  $[M+H]^+ = 1884.7$  N-Me-E obs.  $[M+H]^+ = 1885.3$  N-Me-F obs.  $[M+H]^+ = 1885.7$  N-Me-L obs.  $[M+H]^+ = 1885.6$

Bio-Unmodified peptide Expected  $[M+H]^+ = 2095.2$ , obs.  $[M+H]^+ = 2096.0$  The expected mass of all *N*-methyl peptides  $[M+H]^+ = 2110.1$ , N-Me-D obs.  $[M+H]^+ = 2110.9$  N-Me-K obs.  $[M+H]^+ = 2110.6$  N-Me-L obs.  $[M+H]^+ = 2110.2$  N-Me-Y obs.  $[M+H]^+ = 2110.6$  N-Me-W10 obs.  $[M+H]^+ = 2109.5$  N-Me-W11 obs.  $[M+H]^+ = 2110.6$  N-Me-E obs.  $[M+H]^+ = 2110.0$  N-Me-F obs.  $[M+H]^+ = 2110.0$  N-Me-L obs.  $[M+H]^+ = 2109.8$

Digest product LYWWEFL Expected  $[M+H] = 1056.2$ , obs.  $[M+H] = 1056.6$

R6A Expected  $[M+H] = 2276.6$ , obs.  $[M+H] = 2276.9$  Bio-R6A Expected  $[M+H] = 2501.7$ , obs.  $[M+H] = 2501.2$

### HPLC traces.

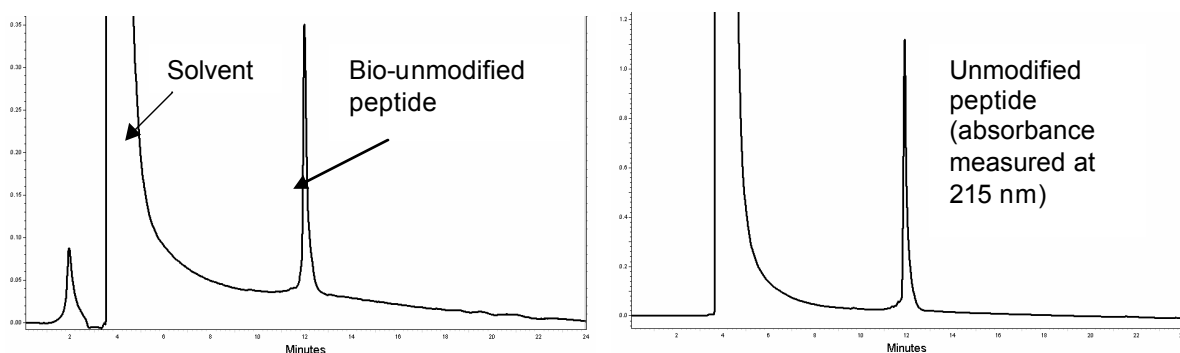

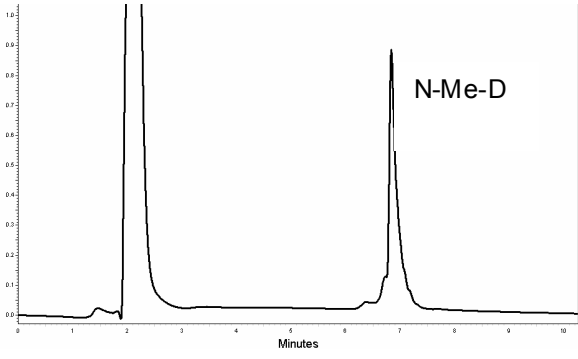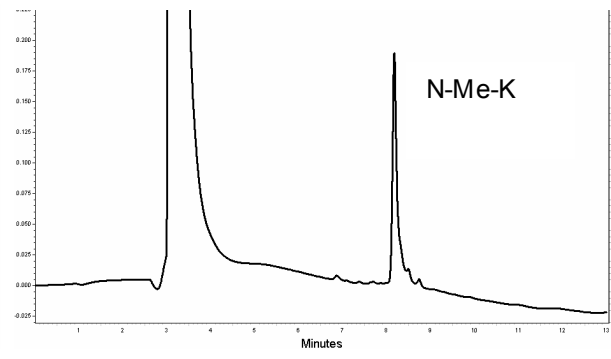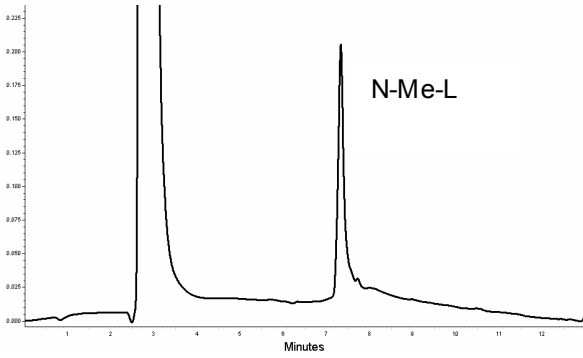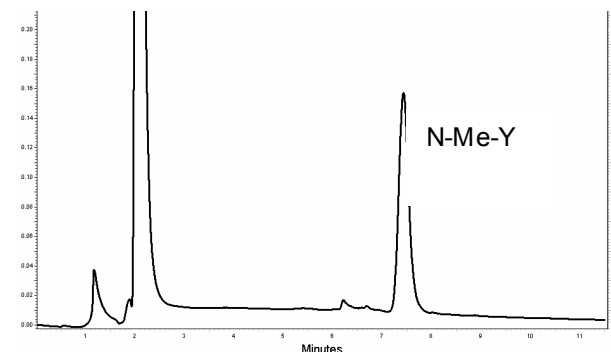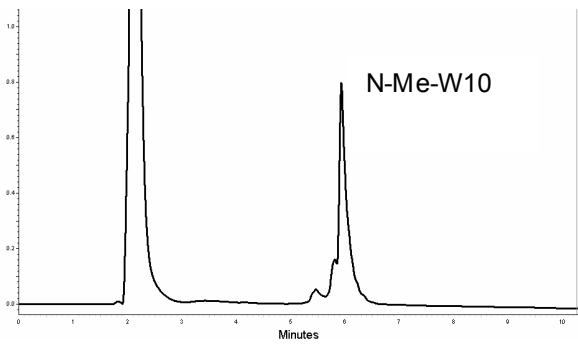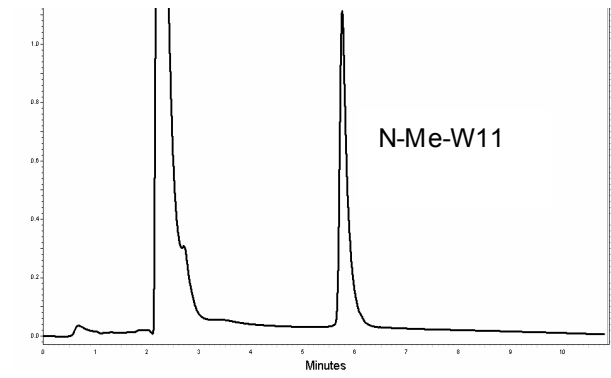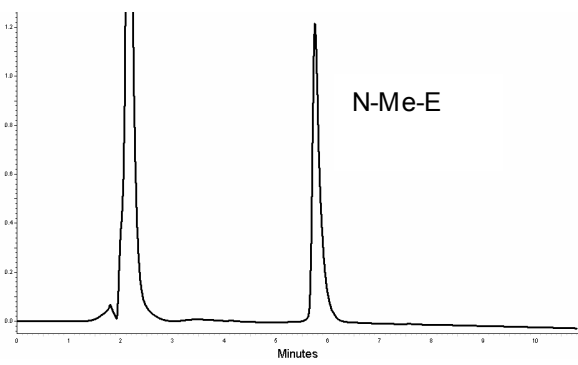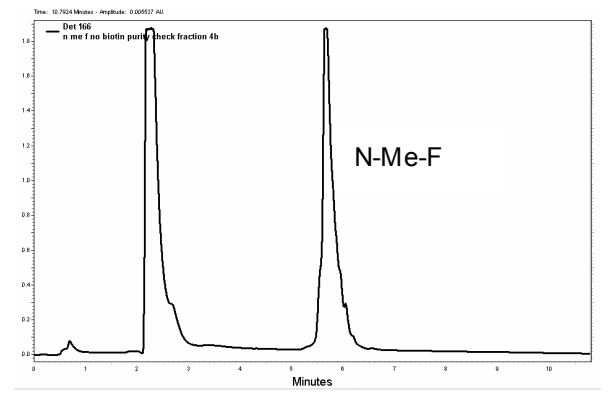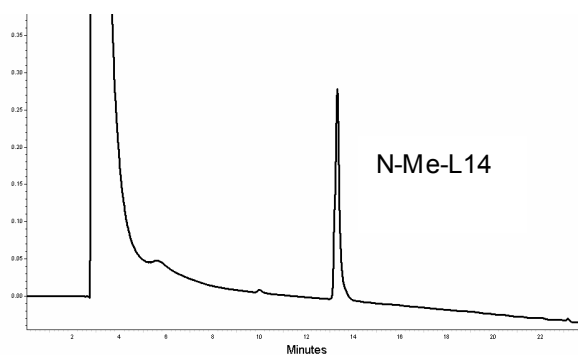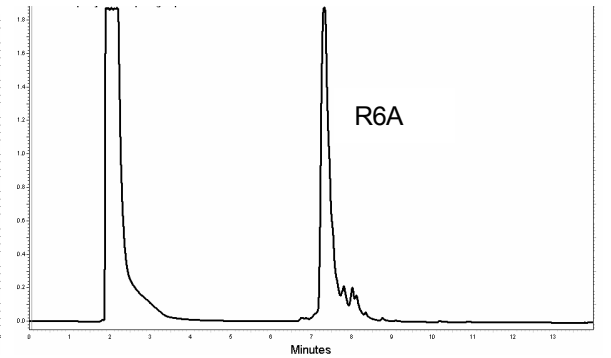

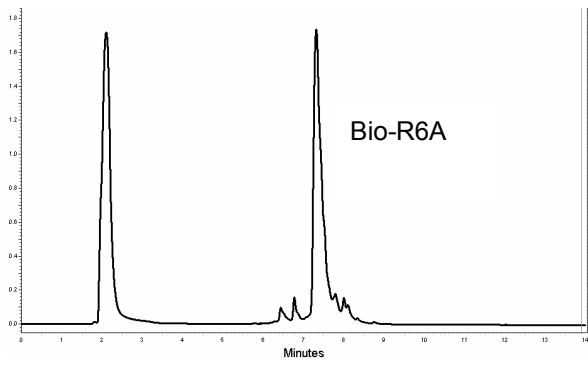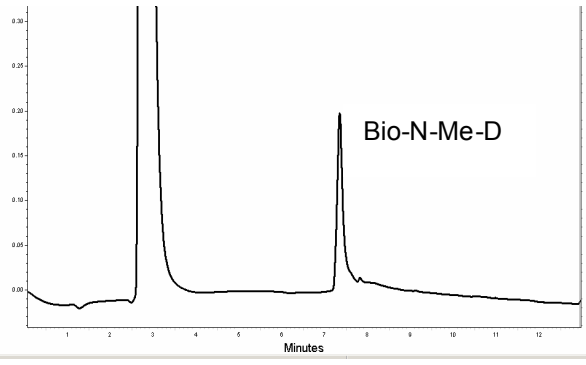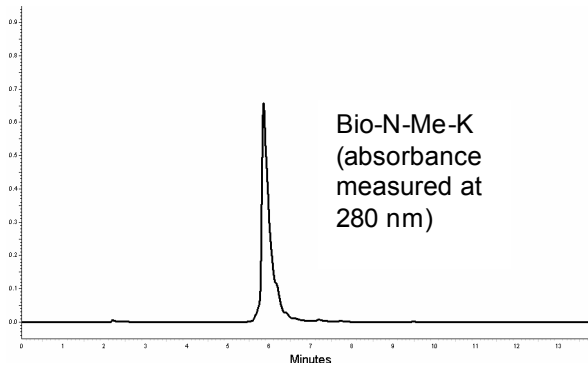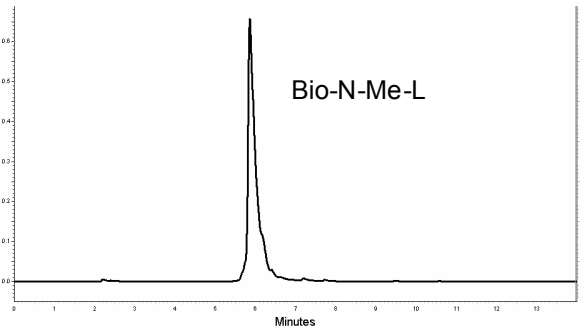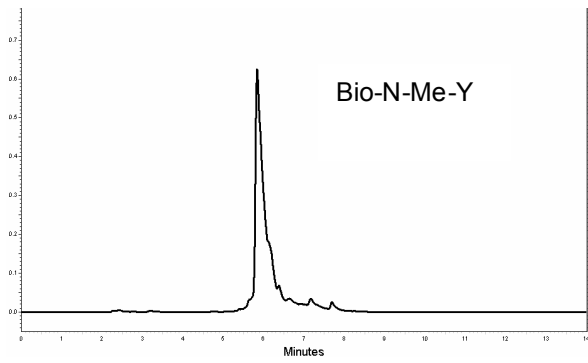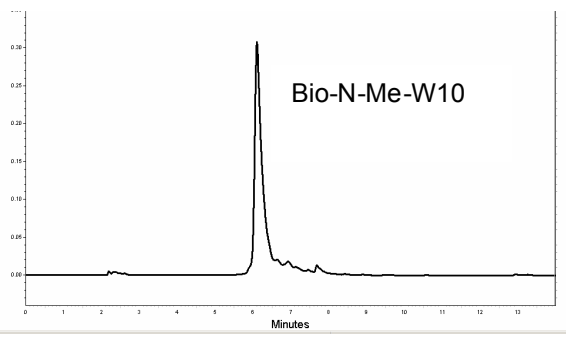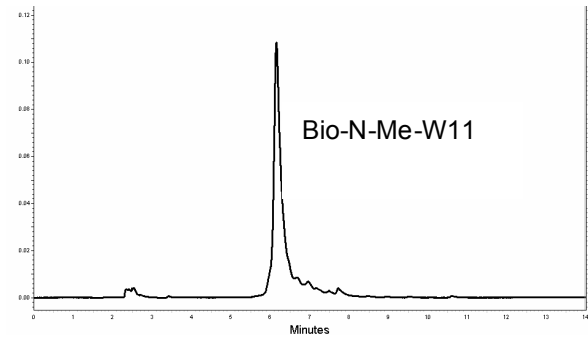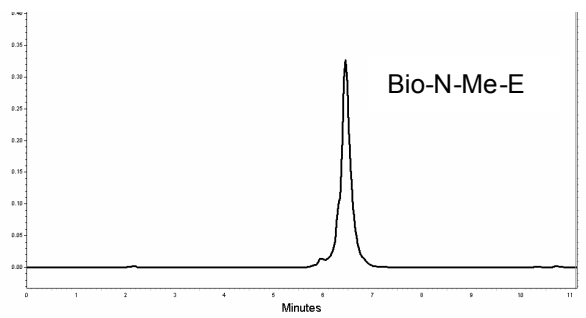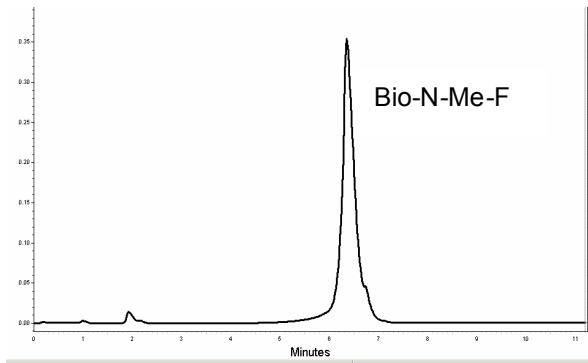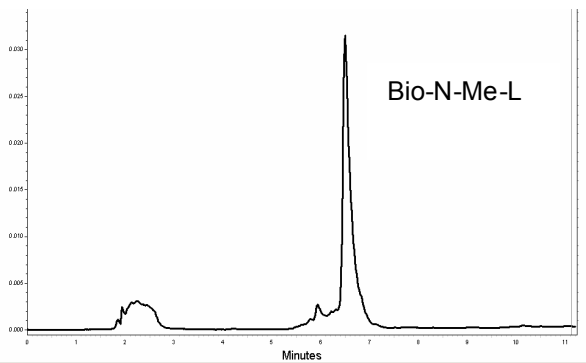

## N-Methyl Selectivity

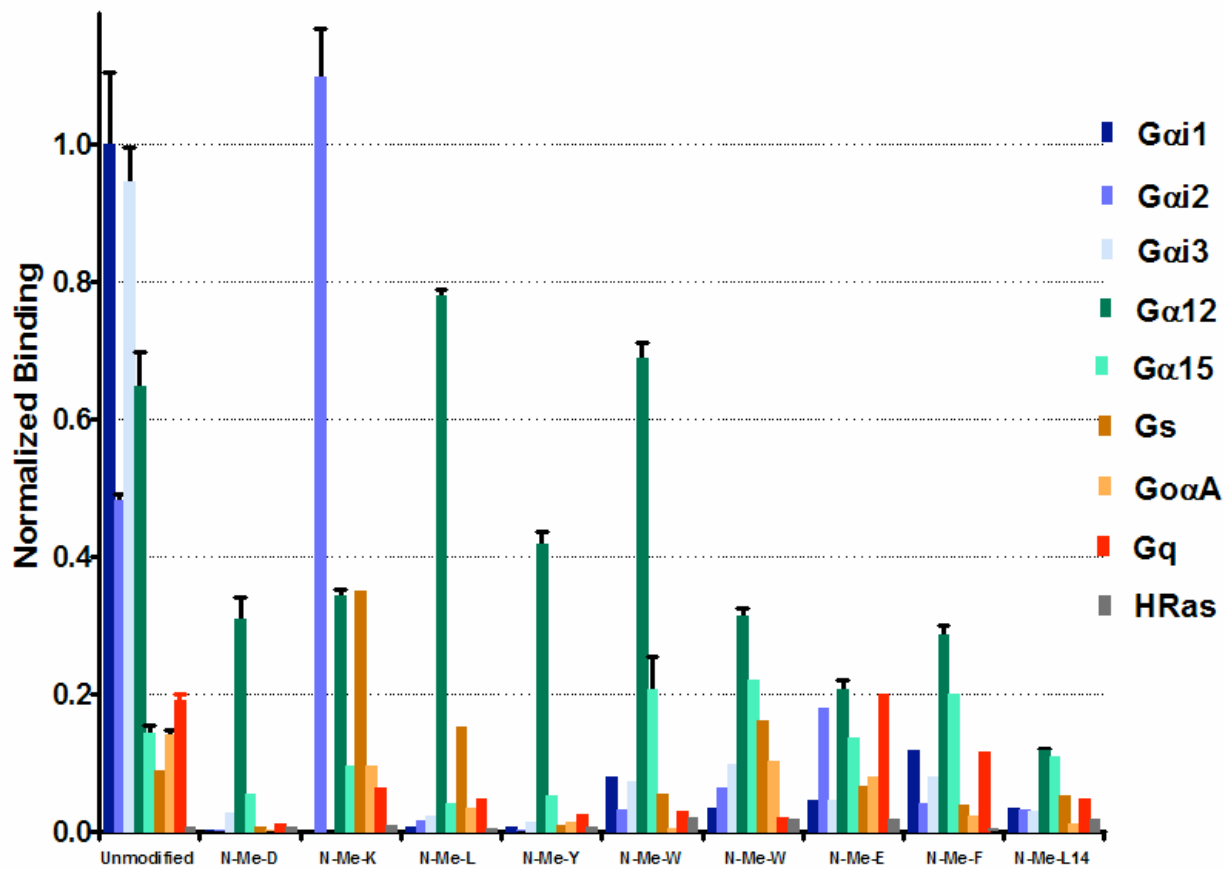

**Figure S1:** Selectivity for the N-methyl peptide library. G protein subunits are color coded. Binding is normalized by dividing the samples cpm by the average cpm obtained for the unmodified peptide binding to its target Gαi1. Two N-Me-K data points have been removed in order to scale the graph in a way to resolve weaker binding interactions.
